# Supplementary material for: A Universal Biofilm Reactor Sensor for the Determination of Biochemical Oxygen Demand of Different Water Areas
Source: MDPI journal article supplement (doi:10.3390/molecules27155046), 2022-08-08
Supplement: s1 [file s1]

## Supporting Information

### **A universal biofilm reactor sensor for the determination of biochemical oxygen demand of different water areas**

Liang Wang, Huan Lv, Qian Yang, Yiliang Chen, Junjie Wei, Yiyuan Chen, Ci'en Peng, Changyu

Liu, Xiaolong Xu \*, Jianbo Jia \*

School of Biotechnology and Health Sciences, Wuyi University, Jiangmen 529020, China

Table S1. List of Experimental Reagents

| NO. | Reagent                        | formula              | factory                    |
|-----|--------------------------------|----------------------|----------------------------|
| 1   | Glucose                        | $C_6H_{12}O_6$       | Macklin                    |
| 2   | Glutamate                      | $C_5H_9NO_4$         | Macklin                    |
| 3   | Sodium chloride                | NaCl                 | Guangzhou Chemical Reagent |
| 4   | Magnesium chloride hexahydrate | $MgCl_2 \cdot 6H_2O$ | Guangzhou Chemical Reagent |
| 5   | Anhydrous sodium sulfate       | $Na_2SO_4$           | Guangzhou Chemical Reagent |
| 6   | Anhydrous calcium chloride     | $CaCl_2$             | Guangzhou Chemical Reagent |
| 7   | Potassium chloride             | KCl                  | Guangzhou Chemical Reagent |
| 8   | Sodium bicarbonate             | $NaHCO_3$            | Guangzhou Chemical Reagent |
| 9   | Sodium bromide                 | NaBr                 | Guangzhou Chemical Reagent |
| 10  | Leucine                        | $C_6H_{13}NO_2$      | Macklin                    |
| 11  | Lysine                         | $C_6H_{14}N_2O_2$    | Macklin                    |
| 12  | Malic acid                     | $C_4H_6O_5$          | Macklin                    |
| 13  | Sorbitol                       | $C_6H_{14}O_6$       | Macklin                    |
| 14  | N-butanol                      | $C_4H_{10}O$         | Guangzhou Chemical Reagent |
| 15  | Fumaric acid                   | $C_4H_4O_4$          | Macklin                    |
| 16  | Ethyl acetate                  | $C_4H_8O_2$          | Guangzhou Chemical Reagent |
| 17  | Xylose                         | $C_5H_{10}O_5$       | Macklin                    |

|    |                                |                |                            |
|----|--------------------------------|----------------|----------------------------|
| 18 | Galactose                      | $C_6H_{12}O_6$ | Macklin                    |
| 19 | Ferric chloride                | $FeCl_3$       | Guangzhou Chemical Reagent |
| 20 | Magnesium sulphate             | $MgSO_4$       | Guangzhou Chemical Reagent |
| 21 | Potassium dihydrogen Phosphate | $KH_2PO_4$     | Guangzhou Chemical Reagent |
| 22 | Disodium hydrogen phosphate    | $Na_2HPO_4$    | Guangzhou Chemical Reagent |
| 23 | Ammonium chloride              | $NH_4Cl$       | Guangzhou Chemical Reagent |

---
